# Supplementary material for: Electrochemical properties of protic ionic liquids: correlation between open circuit potential for H2/O2 cells under non-humidified conditions and ΔpKa
Source: Royal Society of Chemistry journal article supplement (doi:10.1039/c3ra23354e), 2013-01-01
Supplement: c3ra23354e.pdf [file c3ra23354e.pdf]

## SUPPLEMENTARY INFORMATION

### Electrochemical Properties of Protic Ionic Liquids: Correlation between Open Circuit Potential of H<sub>2</sub>/O<sub>2</sub> Cells under Non-humidified Conditions and $\Delta pK_a$

Muhammed Shah Miran,<sup>‡</sup> Tomohiro Yasuda, Md. Abu Bin Hasan Susan,<sup>‡</sup> Kaoru

Dokko and Masayoshi Watanabe\*

*Department of Chemistry and Biotechnology, Yokohama National University*

*79-5 Tokiwadai, Hodogaya-ku, Yokohama 240-8501, Japan*

<sup>‡</sup> *Permanent address: Department of Chemistry, University of Dhaka*

*Dhaka 1000, Bangladesh*

E-mail: [mwatanab@ynu.ac.jp](mailto:mwatanab@ynu.ac.jp)

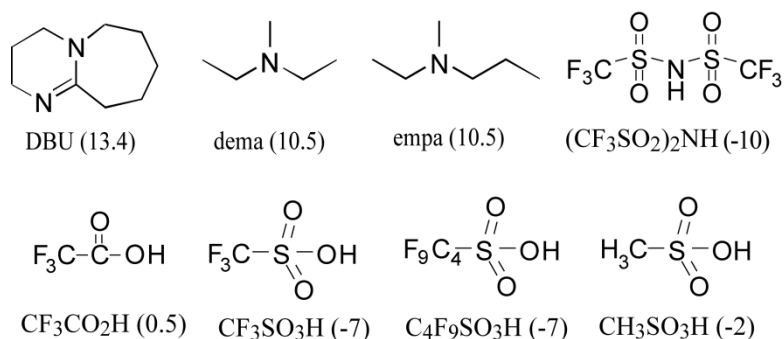

**Figure S1.** Chemical structures of all acids and bases used in this study. Data in parenthesis indicate  $pK_a$  values in aqueous system taken from ref. 6.

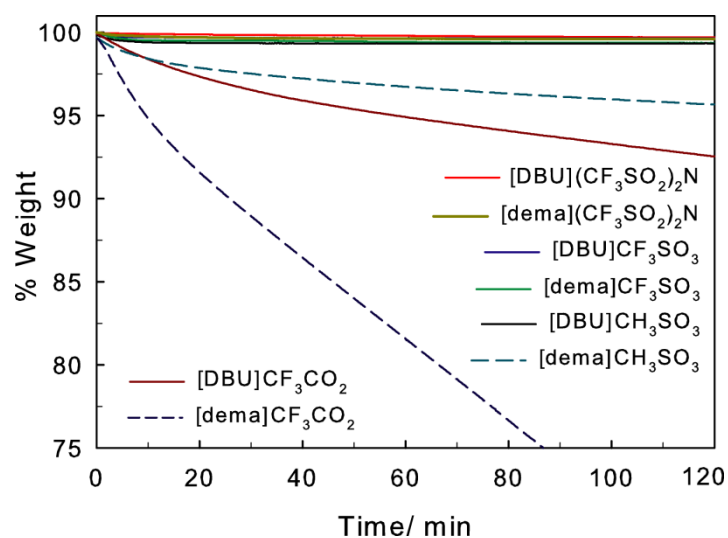

**Figure S2.** Time-dependent isothermal TG curves for [DBU]- and [dema]-based PILs at 130 °C for 2 h under nitrogen atmosphere using aluminum pan.

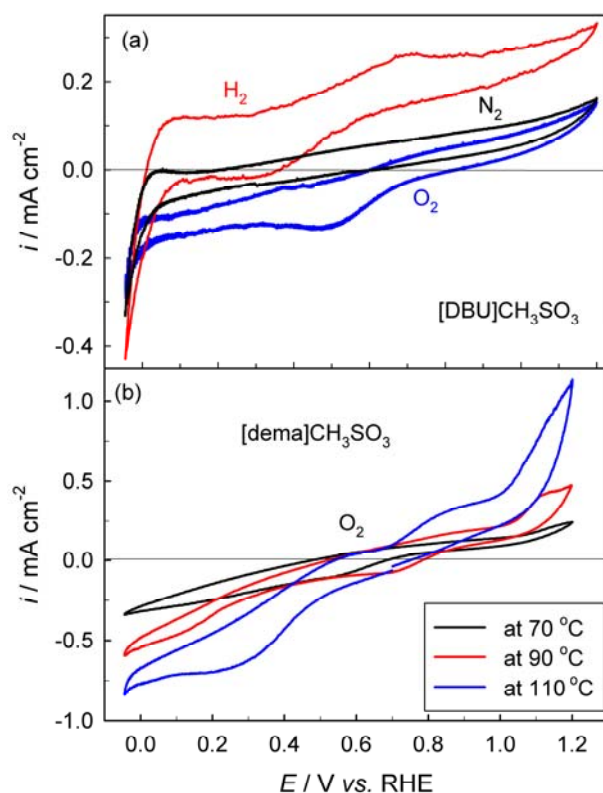

**Figure S3.** Cyclic voltammograms using a Pt wire as working electrode for (a) [DBU]CH<sub>3</sub>SO<sub>3</sub> under O<sub>2</sub>, N<sub>2</sub> and H<sub>2</sub> gas bubbling atmospheres at 110 °C and (b) [dema]CH<sub>3</sub>SO<sub>3</sub> under O<sub>2</sub> gas bubbling atmosphere at different temperatures. Scan rate is 10 mVs<sup>-1</sup>.

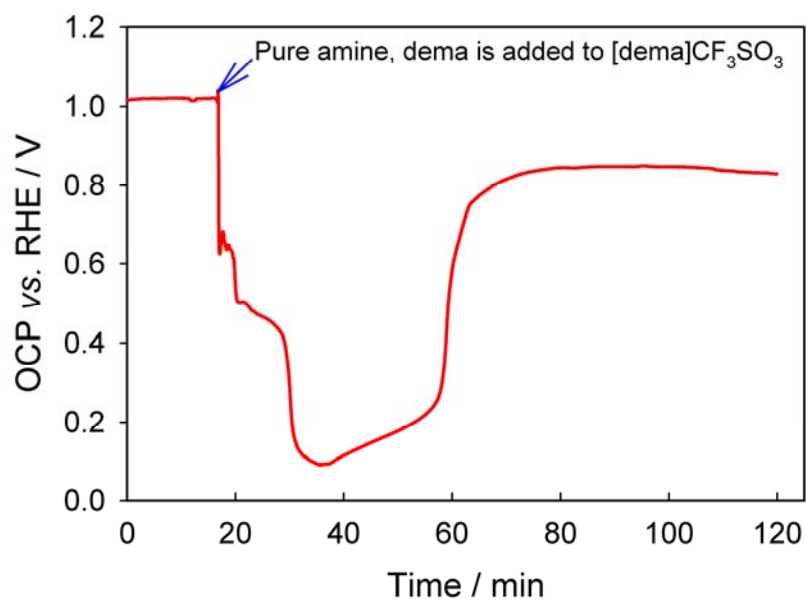

**Figure S4.** Change in OCP at 30 °C as a function of time with the addition of pure amine (dema) to [dema]CF<sub>3</sub>SO<sub>3</sub>.
